# Supplementary material
Source: MDPI journal article supplement (https://www.mdpi.com/2071-1050/12/12/4887)
Supplement: s1 [file s1]

# Factors Affecting the Consumption of Energy-Efficient Lighting Products: Exploring Purchase Behaviors of Thai Consumers

Nuttakrij Apipuchayakul <sup>1</sup> and Sujitra Vassanadumrongdee <sup>2,\*</sup>

## Supplementary Materials

### Cronbach's Alpha (reliability statistics).

| Cronbach's Alpha | Cronbach's Alpha Based on Standardized Items | N. of Items |
|------------------|----------------------------------------------|-------------|
| 0.789            | 0.822                                        | 5           |

### Squared multiple correlation results.

| <u>Endogenous Variable</u> | Square Multiple Correlation (SMC = R <sup>2</sup> ) |
|----------------------------|-----------------------------------------------------|
| PURCHASE INTENTION         | 0.499                                               |
| PURCHASE BEHAVIOR          | 0.500                                               |

## Age Groups Comparisons – ANOVA and Post Hoc using Scheffe Test.

Descriptive statistics (age group comparisons).

|                   |           | N   | Mean   | Std. Deviation | Std. Error | 95% Confidence Interval for Mean |             |
|-------------------|-----------|-----|--------|----------------|------------|----------------------------------|-------------|
|                   |           |     |        |                |            | Lower Bound                      | Upper Bound |
| Purchase Behavior | 18–35 Yrs | 144 | 4.2014 | 0.70981        | 0.05915    | 4.0845                           | 4.3183      |
|                   | 36–49 Yrs | 104 | 4.3750 | 0.59969        | 0.05880    | 4.2584                           | 4.4916      |
|                   | 50–70 Yrs | 39  | 4.5556 | 0.53712        | 0.08601    | 4.3814                           | 4.7297      |
|                   | Total     | 287 | 4.3124 | 0.65989        | 0.03895    | 4.2358                           | 4.3891      |

ANOVA (age group comparisons).

|                   |                | Sum of Squares | df  | Mean Square | F     | Sig.  |
|-------------------|----------------|----------------|-----|-------------|-------|-------|
| Purchase Behavior | Between Groups | 4.488          | 2   | 2.244       | 5.308 | 0.005 |
|                   | Within Groups  | 120.053        | 284 | 0.423       |       |       |
|                   | Total          | 124.541        | 286 |             |       |       |

Post-hoc comparisons using the Scheffe test (age groups).

| Dependent Variable | (I) AGE Group [Recode] | (J) AGE Group [Recode] | Mean Difference (I–J) | Std. Error | Sig.  | 95% C.I.    |
|--------------------|------------------------|------------------------|-----------------------|------------|-------|-------------|
|                    |                        |                        |                       |            |       | Lower Bound |
| Purchase Behavior  | 18–35 Yrs              | 36–49 Yrs              | –0.17361              | 0.08367    | 0.118 | –0.3795     |
|                    |                        | 50–70 Yrs              | –0.35417*             | 0.11737    | 0.011 | –0.6430     |
|                    | 36–49 Yrs              | 18–35 Yrs              | 0.17361               | 0.08367    | 0.118 | –0.0323     |
|                    |                        | 50–70 Yrs              | –0.18056              | 0.12208    | 0.336 | –0.4810     |
|                    | 50–70 Yrs              | 18–35 Yrs              | 0.35417*              | 0.11737    | 0.011 | 0.0654      |
|                    |                        | 36–49 Yrs              | 0.18056               | 0.12208    | 0.336 | –0.1198     |

\* The mean difference is significant at the 0.05 level. Source: Author's own calculation.

## Electric bill payer groups comparisons – ANOVA and post-hoc test using the Scheffe Test.

Descriptive statistics (electric bill payer comparisons).

|                   |                  | N   | Mean   | Std. Deviation | Std. Error | 95% Confidence Interval for Mean |             |
|-------------------|------------------|-----|--------|----------------|------------|----------------------------------|-------------|
|                   |                  |     |        |                |            | Lower Bound                      | Upper Bound |
| Purchase Behavior | Unreported       | 2   | 4.3333 | 0.47140        | 0.33333    | 0.0979                           | 8.5687      |
|                   | Paid Some Months | 15  | 3.9111 | 0.66029        | 0.17049    | 3.5455                           | 4.2768      |
|                   | Paid Regularly   | 174 | 4.4310 | 0.60082        | 0.04555    | 4.3411                           | 4.5209      |
|                   | Never Paid       | 97  | 4.1684 | 0.71706        | 0.07281    | 4.0239                           | 4.3129      |
|                   | Total            | 288 | 4.3148 | 0.65999        | 0.03889    | 4.2383                           | 4.3914      |

ANOVA (electric bill payer comparisons).

|                   |                | Sum of Squares | df  | Mean Square | F     | Sig.  |
|-------------------|----------------|----------------|-----|-------------|-------|-------|
| Purchase Behavior | Between Groups | 6.875          | 3   | 2.292       | 5.509 | 0.001 |
|                   | Within Groups  | 118.137        | 284 | 0.416       |       |       |
|                   | Total          | 125.012        | 287 |             |       |       |

Post-hoc comparisons using the Scheffe test (electric bill payer groups).

| Dependent Variable | (I) E-Bill Payers [Recode] | (J) E-Bill Payers [Recode] | Mean Difference (I-J) | Std. Error | Sig.  | 95% Confidence Interval Lower Bound |
|--------------------|----------------------------|----------------------------|-----------------------|------------|-------|-------------------------------------|
| Purchase Behavior  | Unreported                 | Paid Some Months           | 0.42222               | 0.48551    | 0.860 | -0.9432                             |
|                    |                            | Paid Regularly             | -0.09770              | 0.45867    | 0.997 | -1.3876                             |
|                    |                            | Never Paid                 | 0.16495               | 0.46073    | 0.988 | -1.1308                             |
|                    | Paid Some Months           | Unreported                 | -0.42222              | 0.48551    | 0.860 | -1.7876                             |
|                    |                            | Paid Regularly             | -0.51992 *            | 0.17356    | 0.031 | -1.0080                             |
|                    |                            | Never Paid                 | -0.25727              | 0.17894    | 0.559 | -0.7605                             |
|                    | Paid Regularly             | Unreported                 | 0.09770               | 0.45867    | 0.997 | -1.1922                             |
|                    |                            | Paid Some Months           | 0.51992 *             | 0.17356    | 0.031 | 0.0318                              |
|                    |                            | Never Paid                 | 0.26265 *             | 0.08173    | 0.017 | 0.0328                              |
|                    | Never Paid                 | Unreported                 | -0.16495              | 0.46073    | 0.988 | -1.4607                             |
|                    |                            | Paid Some Months           | 0.25727               | 0.17894    | 0.559 | -0.2460                             |
|                    |                            | Paid Regularly             | -0.26265 *            | 0.08173    | 0.017 | -0.4925                             |

\* The mean difference is significant at the 0.05 level. Source: Author's own calculation.
